# Supplementary material for: A Co-intercalation enhanced V-based cathode material for fast charge aqueous zinc ion batteries
Source: Royal Society of Chemistry journal article supplement (doi:10.1039/d1cc03329h), 2021-01-01
Supplement: d1cc03329h1.pdf [file d1cc03329h1.pdf]

**Electronic Supplementary Information**

**A Co-intercalation Enhanced V-based Cathode Material for Fast Charge Aqueous Zinc Ion Battery**

Shangshang Zhang, Zhenjiang Liu, Lun Li, Shengkai Li, Shuqi Zhang, Yudie Tang, Jiale Yu and Haiyan Zhang\*

School of Materials and Energy, Guangdong University of Technology, Guangzhou, 510006, P. R. China

\* Corresponding author, E-mail: hyzhang@gdut.edu.cn (Prof. **Haiyan Zhang**)

## Experimental Section

### Synthesis of $\text{HNaV}_6\text{O}_{16}\cdot 4\text{H}_2\text{O}$

$\text{HNaV}_6\text{O}_{16}\cdot 4\text{H}_2\text{O}$  (HSVO) was prepared via a simple one-step hydrothermal method. In brief, 0.5523g  $\text{NaVO}_3$  (Aladdin, 99.8%) was dissolved in 60 ml deionized water at 80 °C. After, pH of the solution was adjusted to 2.0-3.0 by HCl (3M). Then, the solution was transferred to 100 mL autoclave and kept at 180 °C for 48 h. The product was collected and washed with distilled water and ethanol thoroughly for 3 times, respectively. The light green fiber was obtained after dried at 60°C for 8 h in air.

### Synthesis of $\text{NaV}_6\text{O}_{15}$

$\text{NaV}_6\text{O}_{15}$  (SVO) was obtained by heating the  $\text{HNaV}_6\text{O}_{16}\cdot 4\text{H}_2\text{O}$  at 500 °C in the air for 3 hours.

### Material characterizations

The XRD patterns of the products were detected by Bruker D8 ADVANCE X-ray Diffractometer (XRD) with  $\text{Cu-K}_\alpha$  radiation (Maximum voltage = 50 kV, Maximum current = 60 mA). The morphologies of the composite were observed by scanning electron microscopy (SEM, SU8010, Hitachi, Japan). TEM and HRTEM (JEM-2100F(URP), JEOL, Japan) were performed to learn the overall morphologies and internal structure. The elements distribution in the sample was scanned by energy dispersive spectrum (EDS). X-ray photoelectron spectroscopy (XPS, Esca lab 250Xi, Thermo Fisher, Britain) was used to analysis the combination status of elements.

### Electrochemical characterizations

The HSVO electrode was prepared by mixing HSVO (70wt.%), conductive carbon additives (Super-P, 20 wt.%), and polyvinylidene fluoride (PVDF, 10 wt.%), then the mixed slurry was cast onto Ti foil and dried in a vacuum oven at 80°C for 8 h. Zinc foil and glass fiber membrane (Whatman, GF/D) were used as the anode and separator, respectively, and Zinc trifluoromethanesulfonate ( $\text{Zn}(\text{CF}_3\text{SO}_3)_2$ , 2 mol in 1L water, Aladdin, AR, 98.0%) solution was used as the electrolyte. A CR2032-type coin cell was assembled in the air atmosphere to evaluate the electrochemical performance on a LAND battery testing system (CT3001A). Cyclic voltammograms (CV) were test on a CHI600E electrochemical workstation. All of the tests were performed at room temperature ( $25\pm 2^\circ\text{C}$ ).

calculation formula of theoretical specific capacity is as follows:

$$C_x = \frac{\frac{1g}{M_x} \cdot N_A \cdot E_x \cdot e}{3600s}$$

$C_x$  : Theoretical specific capacity,  $\text{mAh}\cdot\text{g}^{-1}$

$M_x$ : Relative molecular mass

$E_x$  : Number of electrons gain and loss per molecule

$N_A$  : Avogadro constant ( $6.02\times 10^{23}$ )

$e$  : Elementary charge ( $1.60\times 10^{-19}\text{C}$ )

When the theoretical specific capacity was calculated by  $\text{HNaV}_6\text{O}_{16}\cdot 4\text{H}_2\text{O}$ , the  $M_x$  as 658 and  $E_x$  as 12, the values was  $488.78 \text{mAh}\cdot\text{g}^{-1}$ .

## Supplementary Figures

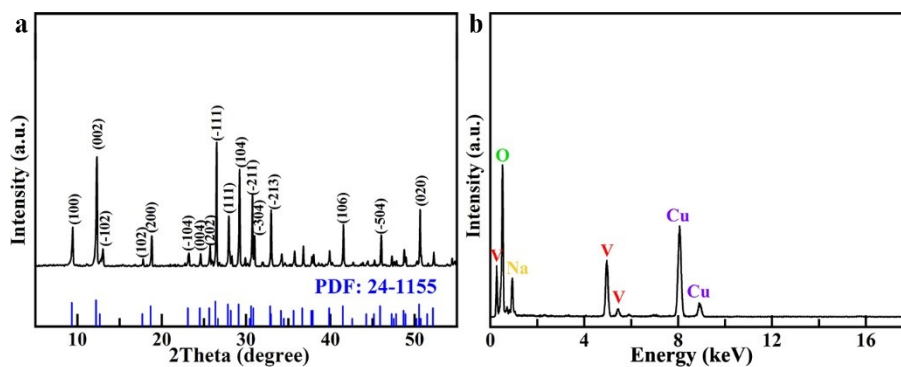

Fig. S1 (a) XRD, (b) EDS of SVO

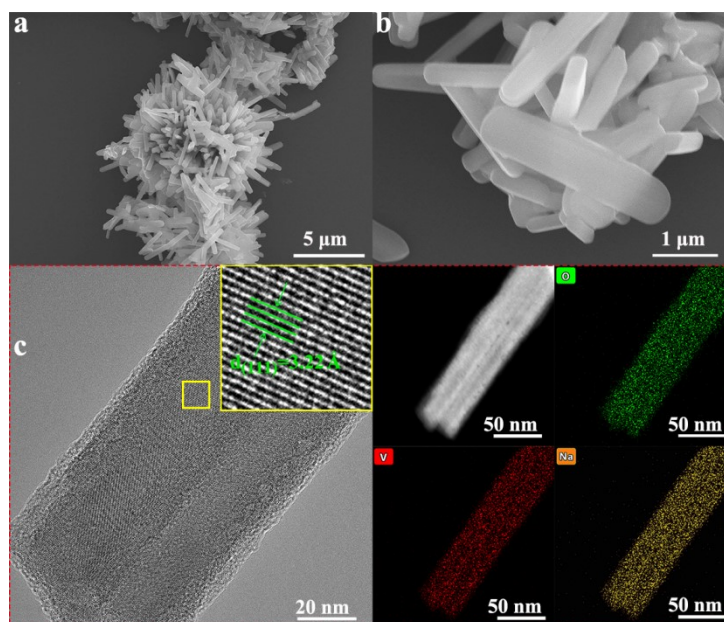

Fig. S2 (a,b) SEM, and (c) HRTEM -Element Mapping of SVO

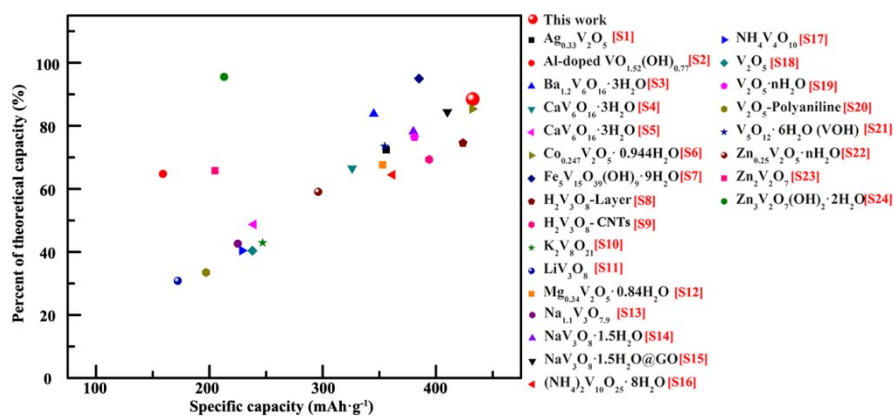

Fig. S3 Summary of the electrochemical performance of V-based cathode materials in AZIBs.<sup>S25</sup>

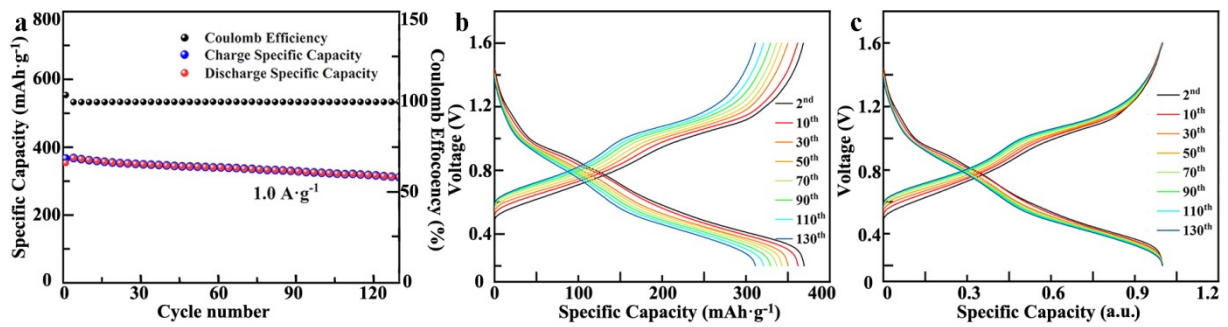

**Fig. S4** (a) cycling performance and the corresponding coulombic efficiency, (b) GCD curves at  $1.0 \text{ A}\cdot\text{g}^{-1}$ ; (c) Normalization GCD curves of HSVO at  $1.0 \text{ A}\cdot\text{g}^{-1}$  HSVO electrode.

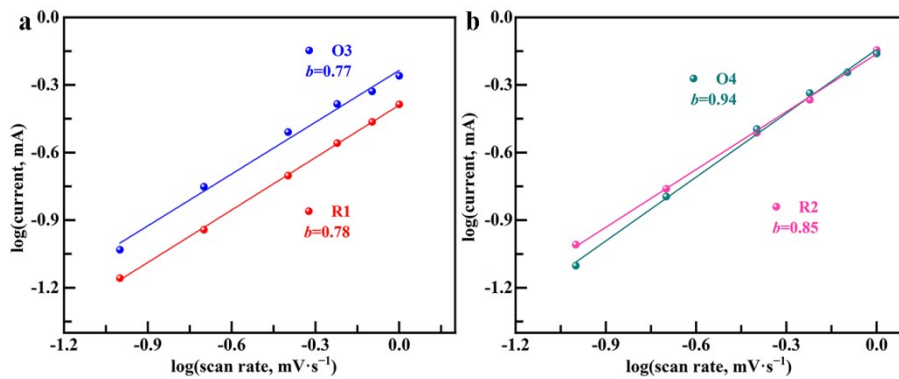

**Fig. S5** Log( $i$ ) vs. log( $v$ ) plots at specific peak currents HSVO electrode in **Fig. 3a**

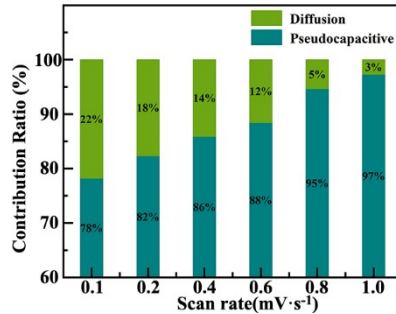

**Fig. S6** Bar chart showing the percent of calculated pseudocapacitive contribution of HSVO electrode at  $0.1\text{-}1.0 \text{ mV}\cdot\text{s}^{-1}$

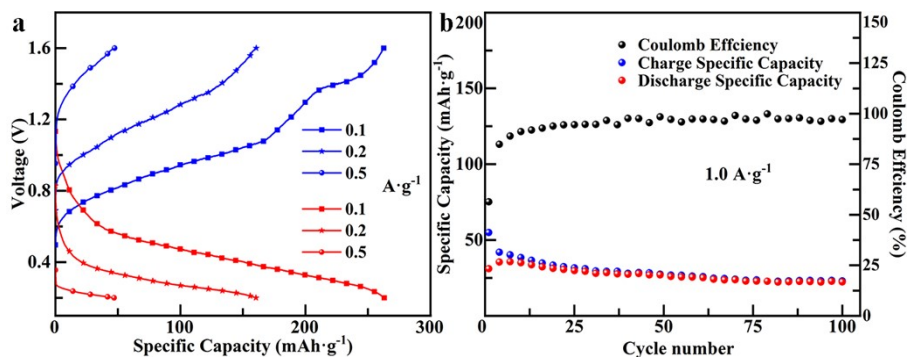

**Fig. S7** (a) GCD curves at  $0.1$  and  $1.0 \text{ A}\cdot\text{g}^{-1}$ , (b) cycling performance and the corresponding coulombic efficiency at  $1.0 \text{ A}\cdot\text{g}^{-1}$  of SVO

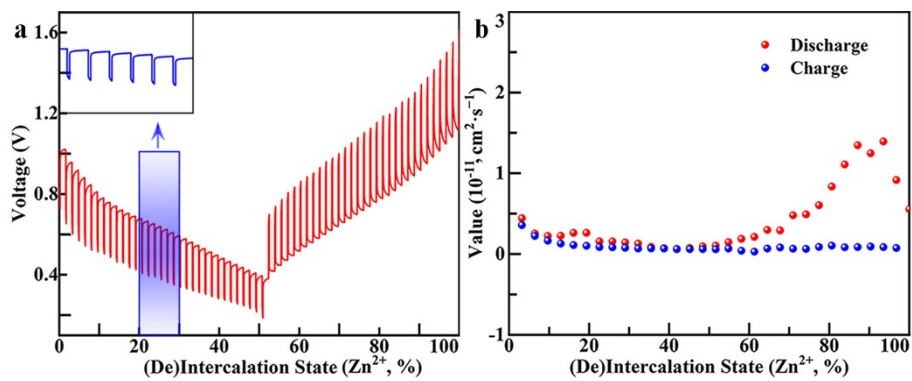

**Fig. S8** (a) GITT measurements and (b) corresponding Zn<sup>2+</sup> diffusion coefficient of SVO at 50 mA·g<sup>-1</sup>

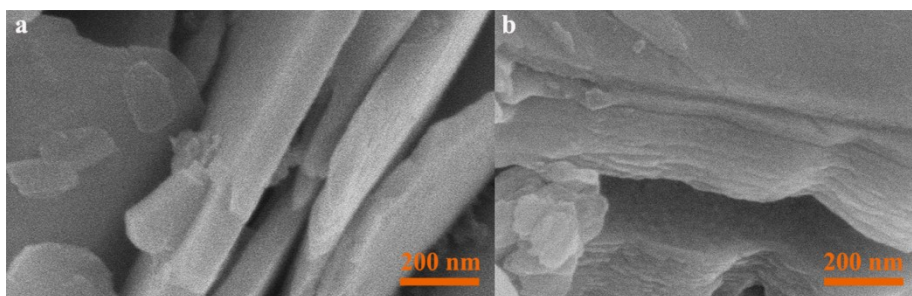

**Fig. S9** SEM image of HSVO electrodes at full charge (a) and discharge (b)

## Supplementary Notes

### Notes S1<sup>S26</sup>

We systematically studied the pseudocapacitive behavior through the analysis of CV curves within the scan rate of 0.1-1.0 mV·s<sup>-1</sup>. There is a power law that links the scan rate with the current, which is

$$i=a \cdot v^b$$

$$\log(i)=b \cdot \log(v)+\log(a)$$

If the value of **b** is 0.5, we can summarize that the capacity is fully contributed by diffusion process, while if the **b** value is 1, we can conclude that the capacity is ruled by the capacitive effect.

### Notes S2<sup>S27</sup>

The reversible capacity in the cycles can be divided into pseudocapacitive contribution and diffusion contribution according to:

$$i=k_1v+k_2v^{1/2}$$

$$i'v^{1/2}=k_1v^{1/2}+k_2$$

where the pseudocapacitive contribution and the diffusion contribution are measured with  $k_1$  and  $k_2$ , respectively

### Notes S3<sup>S28</sup>

Galvanostatic intermittent titration technique (GITT) measurement has been taken to further investigate the kinetics of the Zn<sup>2+</sup> solid-state diffusion of the HSVO electrode at 0.05 A·g<sup>-1</sup>, in which the diffusion coefficient ( $D$ ) of Zn<sup>2+</sup> can be calculated from the parameters and voltage changes during the testing, according to:

$$D = \frac{4l^2}{\pi\tau} \left( \frac{\Delta E_s}{\Delta E_t} \right)^2$$

where  $t$  and  $\tau$  represent the duration of current pulse (s) and relaxation time (s), respectively.  $l$  corresponds to the Zn<sup>2+</sup> diffusion length (equal to the thickness of electrode,  $\approx 0.001$  cm).  $\Delta E_s$  and  $\Delta E_t$  are the steady-state voltage change (V) by the current pulse and voltage change (V) during the constant current pulse (eliminating the voltage changes after relaxation time), respectively.

## Supplementary References

- S1 S. Guo, G. Z. Fang, S. Q. Liang, M. H. Chen, X. W. Wu and J. Zhou, *Acta Materialia*, 2019, **180**, 51-59.
- S2 J. H. Jo, Y. K. Sun and S. T. Myung, *J. Mater. Chem. A*, 2017, **5**, 8367.
- S3 X. Wang, B. J. Xi, X. J. Ma, Z. Y. Feng, Y. X. Jia, J. K. Feng, Y. T. Qian and S. L. Xiong, *Nano Lett.*, 2020, **20**, 2899.
- S4 Y. Zhang, F. Wan, S. Huang, S. Wang, Z. Q. Niu and J. Chen, *Nat. Com.*, 2020, **11**, 2199.
- S5 X. Liu, H. Zhang, D. Geiger, J. Han, A. Varzi, U. Kaiser, A. Moretti and S. Passerini, *Chem. Commun.*, 2019, **55**, 2265.
- S6 L. T. Ma, N. Li, C. B. Long, B. B. Dong, D. L. Fang, Z. X. Liu, Y. W. Zhao, X. L. Li, J. Fan, S. M. Chen, S. J. Zhang and C. Y. Zhi, *Adv. Funct. Mater.*, 2019, **29**, 1906142.
- S7 Z. Peng, Q. L. Wei, S. S. Tan, P. He, W. Luo, Q. Y. An and L. Q. Mai, *Chem. Commun.*, 2018, **54**, 4041.
- S8 P. He, Y. L. Quan, X. Xu, M. Y. Yan, W. Yang, Q. Y. An, L. He and L. Q. Mai, *Small*, 2017, **13**, 1702551.
- S9 Q. Pang, C. L. Sun, Y. H. Yu, K. N. Zhao, Z. Y. Zhang, P. M. Voyles, G. Chen, Y. J. Wei and X. D. Wang, *Adv. Energy Mater.*, 2018, **8**, 1800144.
- S10 B. Y. Tang, G. Z. Fang, J. Zhou, L. B. Wang, Y. P. Lei, C. Wang, T. Q. Lin, Y. Tang and S. Q. Liang, *Nano Energy*, 2018, **51**, 579
- S11 M. H. Alfaruqi, V. Mathew, J. J. Song, S. J. Kim, S. Islam, D. T. Pham, J. Jo, S. Kim, J. P. Baboo, Z. L. Xiu, K. S. Lee, Y. K. Sun and J. Kim, *Chem. Mater.*, 2017, **29**, 1684
- S12 F. W. Ming, H. F. Liang, Y. J. Lei, S. Kandambeth, M. Eddaoudi and H. N. Alshareef, *ACS Energy Lett.*, 2018, **3**, 2602.
- S13 B. H. she, L. T. Shan, H. J. Chen, J. Zhou, X. Guo, G. Z. Fang, X. X. Cao and S. Q. Liang, *J. Energy Chem.*, 2019, **37**, 172.
- S14 F. Wan, L. L. Zhang, X.i Dai, X. Y. Wang, Z. Q. Niu and J. Chen, *Nat. Com.*, 2018, **9**, 1656.
- S15 F. Wan, X. Y. Wang, S. S. Bi, Z. Q. Niu and J. Chen, *Sci. China Chem.*, 2019, **62**, 609.
- S16 T. Y. Wei, Q. Li, G. Z. Yang and C. X. Wang, *J. Mater. Chem. A*, 2018, **6**, 20402.
- S17 B. Y. Tang, J. Zhou, G. Z. Fang, F. Liu, C. Y. Zhu, C. Wang, A. Q. Pan and S. Q. Liang, *J. Mater. Chem. A*, 2019, **7**, 940.
- S18 F. Liu, Z. X Chen, G. Z Fang, Z. Q Wang, Y. S. Cai, B. Y. Tang, J. Zhou and S. Q. Liang, *Nano-Micro Lett.*, 2019, **11**, 25.
- S19 M. Y. Yan, P. He, Y. Chen, S. Y. Wang, Q. L. Wei, K. N. Zhao, X. Xu, Q. Y. An, Y. Shuang, Y. Y. Shao, K. T. Mueller, L. Q. Mai, J. Liu and J. H. Yang, *Adv. Mater.*, 2018, **30**, 1703725.1.
- S20 S. C. Liu, H. Zhu, B. H. Zhang, G. Li, H. K. Zhu, Y. Ren, H. B. Geng, Y. Yang, Q. Liu and C. C. Li, *Adv. Mater.*, 2020, **32**, 2001113.
- S21 N. Zhang, M. Jia, Y. Dong, Y. Y. Wang, J. H. Xu, Y. C. Liu, L. F. Jiao and F. Y. Cheng, *Adv. Funct. Mater.*, 2019, **29**, 1807331.
- S22 D. Kundu, B. D. Adams, V. Duffort, S. H. Vajargah and L. F. Nazar, *Nature Energy*, 2016, 16119.
- S23 B. Sambandam, V. Soundharrajan, S. Kim, M. H. Alfaruqi, J. Jo, S. Kim, V. Mathew, Y. K. Sun and J. Kim, *J. Mater. Chem. A*, 2018, **6**, 3850.
- S24 C. Xia, J. Guo, Y. J. Lei, H. F. Liang, C. Zhao and H. N. Alshareef, *Adv. Mater.*, 2018, **30**, 1705580.
- S25 S. S. Zhang, Z. J. Liu, L. Li, Y. D. Tang, S. K. Li, H. T. Huang and H. Y. Zhang, *J. Mater. Chem. A*, 2021, **9**, 18488-18497.

- S26 D. L. Chao, C. R. Zhu, P. H. Yang, X. H. Xia, J. L. Liu, J. Wang, X. F. Fan, S. V. Savilov, J. Y. Lin, H. J. Fan and Z. X. Shen, *Nat. Commun.* 2016, **7**, 12122.
- S27 V. Augustyn, J. Come, M. A. Lowe, J. W. Kim, P. L. Taberna, S. H. Tolbert, H. D. Abruoa, P. Simon and B. Dunn, *Nat. Mater.* 2013, **12**, 518.
- S28 N. Zhang, F. Cheng, Y. Liu, Q. Zhao, K. Lei, C. Chen, X. Liu and J. Chen. *J. Am. Chem. Soc.* 2016, **138**, 12894.
